# Supplementary material for: Consumption and Breakfast Patterns in Children and Adolescents with Congenital Heart Disease
Source: MDPI journal article supplement (doi:10.3390/ijerph20065146), 2023-03-15
Supplement: s1 [file s1]

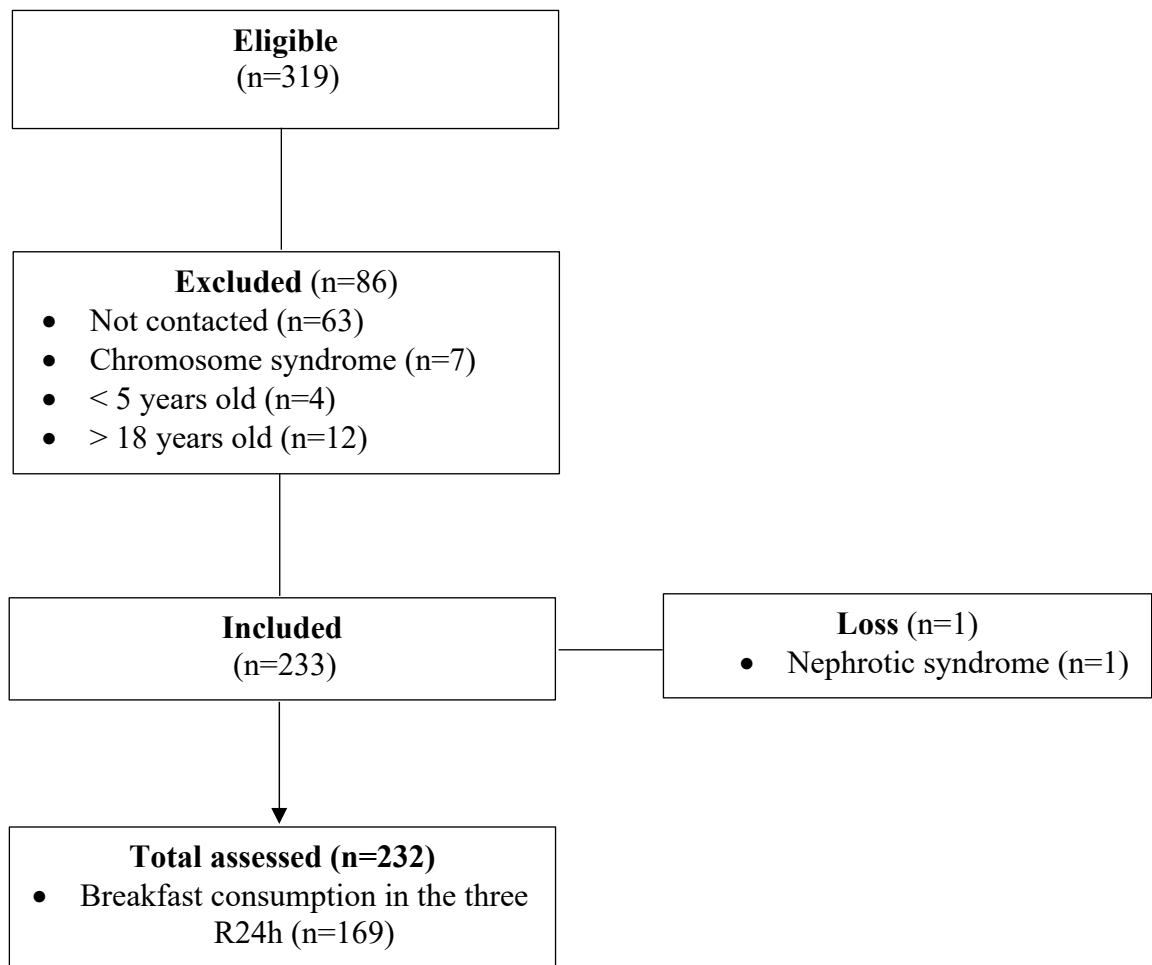

**Figure S1.** Flowchart of the selection of children and adolescents with CHD. Florianópolis, Southern Brazil, 2017.
